# Supplementary material for: New Coordination Polymers of Selected Lanthanides with 1,2-Phenylenediacetate Linker: Structures, Thermal and Luminescence Properties
Source: MDPI journal article supplement (doi:10.3390/ma14174871), 2021-08-27
Supplement: s1 [file s1]

# New coordination polymers of selected lanthanides with 1,2-phenylenediacetate linker: structures, thermal and luminescence properties

Renata Łyszczek<sup>1,\*</sup>, Iwona Rusinek<sup>1</sup>, Agnieszka Ostasz<sup>1</sup>, Justyna Sienkiewicz-Gromiuk<sup>1</sup>, Dmytro Vlasyuk<sup>1</sup>, Marcin Groszek<sup>1</sup>, Agnieszka Lipke<sup>2</sup>, Oleksiy Pavlyuk<sup>3</sup>

Table S1. Selected bonds lengths(Å) and angles(°) for complexes 2 and 3 (coordination environment).

| 2         |           | 3         |            |
|-----------|-----------|-----------|------------|
| Sm1-O11   | 2.391 (7) | Eu1-O11   | 2.381 (7)  |
| Sm1-O43   | 2.523 (6) | Eu1-O43   | 2.496 (7)  |
| Sm1-O44   | 2.490 (6) | Eu1-O44   | 2.471 (6)  |
| Sm1-O52   | 2.357 (6) | Eu1-O52   | 2.337 (6)  |
| Sm1-O53i  | 2.509 (6) | Eu1-O53i  | 2.494 (7)  |
| Sm1-O54i  | 2.564 (6) | Eu1-O54i  | 2.560 (7)  |
| Sm1-O61   | 2.421 (6) | Eu1-O61   | 2.409 (6)  |
| Sm1-O63i  | 2.498 (6) | Eu1-O63i  | 2.485 (6)  |
| Sm1-O64i  | 2.510 (7) | Eu1-O64i  | 2.510 (7)  |
| Sm1-C510i | 2.897 (9) | Eu1-C510i | 2.882 (10) |
| Sm1-C610i | 2.875 (9) | Eu1-C610i | 2.864 (10) |
| Sm2-O13   | 2.521 (6) | Eu2-O13   | 2.508 (7)  |
| Sm2-O14   | 2.470 (7) | Eu2-O14   | 2.452 (7)  |
| Sm2-O22   | 2.328 (7) | Eu2-O22   | 2.311 (7)  |
| Sm2-O23i  | 2.598 (6) | Eu2-O23i  | 2.587 (6)  |
| Sm2-O24i  | 2.523 (6) | Eu2-O24i  | 2.520 (7)  |
| Sm2-O31   | 2.494 (7) | Eu2-O31   | 2.494 (7)  |
| Sm2-O32   | 2.543 (6) | Eu2-O32   | 2.537 (7)  |
| Sm2-O33i  | 2.412 (6) | Eu2-O33i  | 2.395 (7)  |

|            |            |            |            |
|------------|------------|------------|------------|
| Sm2-O41    | 2.417 (7)  | Eu2-O41    | 2.410 (7)  |
| Sm2-C210i  | 2.915 (10) | Eu2-C210i  | 2.897 (10) |
| Sm3-O12    | 2.340 (6)  | Eu3-O12    | 2.331 (6)  |
| Sm3-O13ii  | 2.494 (6)  | Eu3-O13ii  | 2.478 (7)  |
| Sm3-O21ii  | 2.380 (6)  | Eu3-O21ii  | 2.374 (6)  |
| Sm3-O23iii | 2.411 (6)  | Eu3-O23iii | 2.395 (6)  |
| Sm3-O31S   | 2.466 (7)  | Eu3-O31S   | 2.456 (8)  |
| Sm3-O41S   | 2.460 (7)  | Eu3-O41S   | 2.447 (8)  |
| Sm3-O61    | 2.485 (6)  | Eu3-O61    | 2.477 (6)  |
| Sm3-O62    | 2.714 (6)  | Eu3-O62    | 2.718 (7)  |
| Sm3-O63i   | 2.506 (6)  | Eu3-O63i   | 2.491 (7)  |
| Sm4-O11S   | 2.440 (7)  | Eu4-O11S   | 2.433 (7)  |
| Sm4-O21S   | 2.413 (7)  | Eu4-O21S   | 2.405 (7)  |
| Sm4-O32    | 2.496 (6)  | Eu4-O32    | 2.494 (7)  |
| Sm4-O33i   | 2.481 (6)  | Eu4-O33i   | 2.482 (6)  |
| Sm4-O34i   | 2.739 (7)  | Eu4-O34i   | 2.725 (7)  |
| Sm4-O42    | 2.325 (7)  | Eu4-O42    | 2.320 (7)  |
| Sm4-O44    | 2.519 (7)  | Eu4-O44    | 2.512 (7)  |
| Sm4-O51    | 2.394 (6)  | Eu4-O51    | 2.388 (6)  |
| Sm4-O54i   | 2.442 (6)  | Eu4-O54i   | 2.425 (6)  |

Table S2. Selected bonds lengths(Å) and angles(°) for **2** and **3**.

| Bond lengths (Å) | <b>2</b>   | <b>3</b>   |
|------------------|------------|------------|
| O11-C110         | 1.241 (12) | 1.248 (13) |
| O11S-C12S        | 1.234 (12) | 1.236 (13) |
| O12-C110         | 1.277 (12) | 1.260 (12) |
| O13-C108         | 1.243 (11) | 1.275 (12) |
| O14-C108         | 1.262 (11) | 1.252 (12) |
| O21-C208         | 1.245 (10) | 1.262 (11) |
| O21S-C22S        | 1.175 (14) | 1.185 (14) |
| O22-C208         | 1.251 (10) | 1.256 (11) |

|           |            |            |
|-----------|------------|------------|
| O23-C210  | 1.277 (10) | 1.280 (11) |
| O24-C210  | 1.233 (11) | 1.247 (12) |
| O31-C308  | 1.258 (11) | 1.244 (12) |
| O31S-C32S | 1.202 (13) | 1.257 (14) |
| O32-C308  | 1.284 (11) | 1.292 (12) |
| O33-C310  | 1.275 (11) | 1.289 (11) |
| O34-C310  | 1.232 (10) | 1.227 (11) |
| O41-C408  | 1.233 (12) | 1.238 (13) |
| O41S-C42S | 1.234 (12) | 1.219 (13) |
| O42-C408  | 1.238 (12) | 1.249 (13) |
| O43-C410  | 1.240 (11) | 1.233 (11) |
| O44-C410  | 1.268 (12) | 1.273 (12) |
| O51-C508  | 1.255 (10) | 1.264 (11) |
| O52-C508  | 1.238 (10) | 1.244 (11) |
| O53-C510  | 1.233 (10) | 1.232 (11) |
| O54-C510  | 1.273 (10) | 1.285 (11) |
| O61-C608  | 1.280 (11) | 1.302 (12) |
| O62-C608  | 1.238 (10) | 1.227 (11) |
| O63-C610  | 1.285 (10) | 1.293 (11) |
| O64-C610  | 1.229 (10) | 1.229 (11) |
| N13S-C12S | 1.291 (14) | 1.281 (15) |
| N13S-C14S | 1.420 (16) | 1.421 (16) |
| N13S-C15S | 1.429 (16) | 1.429 (17) |
| N23S-C22S | 1.306 (14) | 1.316 (15) |
| N23S-C24S | 1.469 (15) | 1.434 (16) |
| N23S-C25S | 1.381 (16) | 1.406 (17) |
| N33S-C32S | 1.306 (14) | 1.255 (14) |
| N33S-C35S | 1.423 (17) | 1.410 (18) |
| N33S-C34S | 1.392 (18) | 1.425 (18) |
| N43S-C42S | 1.302 (14) | 1.290 (14) |
| N43S-C44S | 1.451 (15) | 1.433 (16) |
| N43S-C45S | 1.453 (15) | 1.454 (15) |
| C101-C102 | 1.401 (12) | 1.411 (13) |

|             |            |            |
|-------------|------------|------------|
| C101-C106   | 1.388 (13) | 1.385 (13) |
| C101-C107   | 1.488 (13) | 1.503 (14) |
| C102-C103   | 1.392 (13) | 1.394 (14) |
| C102-C109iv | 1.516 (13) | 1.529 (13) |
| C103-C104   | 1.362 (15) | 1.367 (16) |
| C104-C105   | 1.366 (16) | 1.381 (16) |
| C105-C106   | 1.376 (15) | 1.364 (16) |
| C107-C108   | 1.523 (13) | 1.516 (14) |
| C109-C110   | 1.514 (14) | 1.519 (14) |
| C201-C202   | 1.386 (12) | 1.393 (13) |
| C201-C206   | 1.402 (12) | 1.391 (13) |
| C201-C207   | 1.533 (13) | 1.526 (13) |
| C202-C203   | 1.379 (13) | 1.383 (13) |
| C202-C209   | 1.508 (12) | 1.513 (12) |
| C203-C204   | 1.386 (14) | 1.375 (14) |
| C204-C205   | 1.347 (15) | 1.372 (15) |
| C205-C206   | 1.371 (14) | 1.371 (15) |
| C207-C208   | 1.498 (12) | 1.498 (12) |
| C209-C210   | 1.507 (12) | 1.527 (13) |
| C301-C302   | 1.391 (13) | 1.396 (14) |
| C301-C306   | 1.396 (13) | 1.399 (14) |
| C301-C307   | 1.487 (12) | 1.501 (13) |
| C302-C303   | 1.388 (14) | 1.387 (15) |
| C303-C304   | 1.370 (15) | 1.369 (16) |
| C304-C305   | 1.378 (15) | 1.360 (16) |
| C305-C306   | 1.380 (13) | 1.390 (14) |
| C306-C309   | 1.489 (13) | 1.487 (14) |
| C307-C308   | 1.502 (12) | 1.511 (13) |
| C309-C310   | 1.507 (11) | 1.515 (12) |
| C401-C402   | 1.407 (13) | 1.387 (13) |
| C401-C406   | 1.377 (15) | 1.409 (16) |
| C401-C407   | 1.505 (13) | 1.508 (14) |
| C402-C403   | 1.420 (14) | 1.406 (14) |

|           |            |            |
|-----------|------------|------------|
| C402-C409 | 1.492 (13) | 1.519 (13) |
| C403-C404 | 1.363 (15) | 1.372 (16) |
| C404-C405 | 1.358 (17) | 1.354 (18) |
| C405-C406 | 1.381 (16) | 1.374 (17) |
| C407-C408 | 1.525 (13) | 1.526 (14) |
| C409-C410 | 1.504 (12) | 1.528 (13) |
| C501-C502 | 1.374 (12) | 1.393 (13) |
| C501-C506 | 1.390 (12) | 1.389 (12) |
| C501-C507 | 1.540 (12) | 1.518 (13) |
| C502-C503 | 1.371 (13) | 1.378 (14) |
| C502-C509 | 1.523 (12) | 1.517 (12) |
| C503-C504 | 1.365 (14) | 1.366 (15) |
| C504-C505 | 1.366 (14) | 1.377 (15) |
| C505-C506 | 1.372 (13) | 1.387 (14) |
| C507-C508 | 1.527 (12) | 1.536 (13) |
| C509-C510 | 1.486 (12) | 1.492 (13) |
| C601-C602 | 1.381 (12) | 1.411 (13) |
| C601-C606 | 1.376 (12) | 1.380 (13) |
| C601-C607 | 1.490 (12) | 1.495 (12) |
| C602-C603 | 1.395 (13) | 1.383 (14) |
| C602-C609 | 1.511 (12) | 1.500 (13) |
| C603-C604 | 1.363 (15) | 1.370 (15) |
| C604-C605 | 1.383 (15) | 1.380 (16) |
| C605-C606 | 1.375 (14) | 1.367 (15) |
| C607-C608 | 1.499 (13) | 1.510 (13) |
| C609-C610 | 1.502 (12) | 1.514 (13) |

Table S3 The hydrogen contacts in structures of **2** and **3**.

| D–H...A                       | D–H         | H...A       | D...A           | D–H...A    |
|-------------------------------|-------------|-------------|-----------------|------------|
| C207–H20B...O24 <sup>i</sup>  | 0.97        | 2.50        | 3.116(1)        | 122        |
|                               | <i>0.97</i> | <i>2.48</i> | <i>3.129(1)</i> | <i>124</i> |
| C209–H20C...O62 <sup>i</sup>  | 0.97        | 2.38        | 3.118(1)        | 133        |
|                               | <i>0.97</i> | <i>2.35</i> | <i>3.084(1)</i> | <i>132</i> |
| C32S–H32S...O61               | 0.93        | 2.56        | 3.150(1)        | 121        |
|                               | <i>0.93</i> | <i>2.58</i> | <i>3.153(1)</i> | <i>121</i> |
| C409–H40D...O42               | 0.97        | 2.43        | 2.999(1)        | 117        |
|                               | <i>0.97</i> | <i>2.39</i> | <i>2.975(1)</i> | <i>118</i> |
| C509–H50D...O34 <sup>ii</sup> | 0.97        | 2.32        | 3.118(1)        | 140        |
|                               | <i>0.97</i> | <i>2.34</i> | <i>3.123(1)</i> | <i>138</i> |
| C607–H60B...O43               | 0.97        | 2.48        | 3.186(1)        | 129        |
|                               | <i>0.97</i> | <i>2.48</i> | <i>3.179(1)</i> | <i>129</i> |
| C206–H206...O22               | 0.93        | 2.33        | 2.970(1)        | 125        |
|                               | <i>0.93</i> | <i>2.34</i> | <i>2.975(1)</i> | <i>126</i> |
| C506–H506...O52               | 0.93        | 2.39        | 3.006(1)        | 123        |
|                               | <i>0.93</i> | <i>2.40</i> | <i>3.010(1)</i> | <i>123</i> |

Symmetry code: i 1+x,y,z; ii /2-x,y,1/2+z

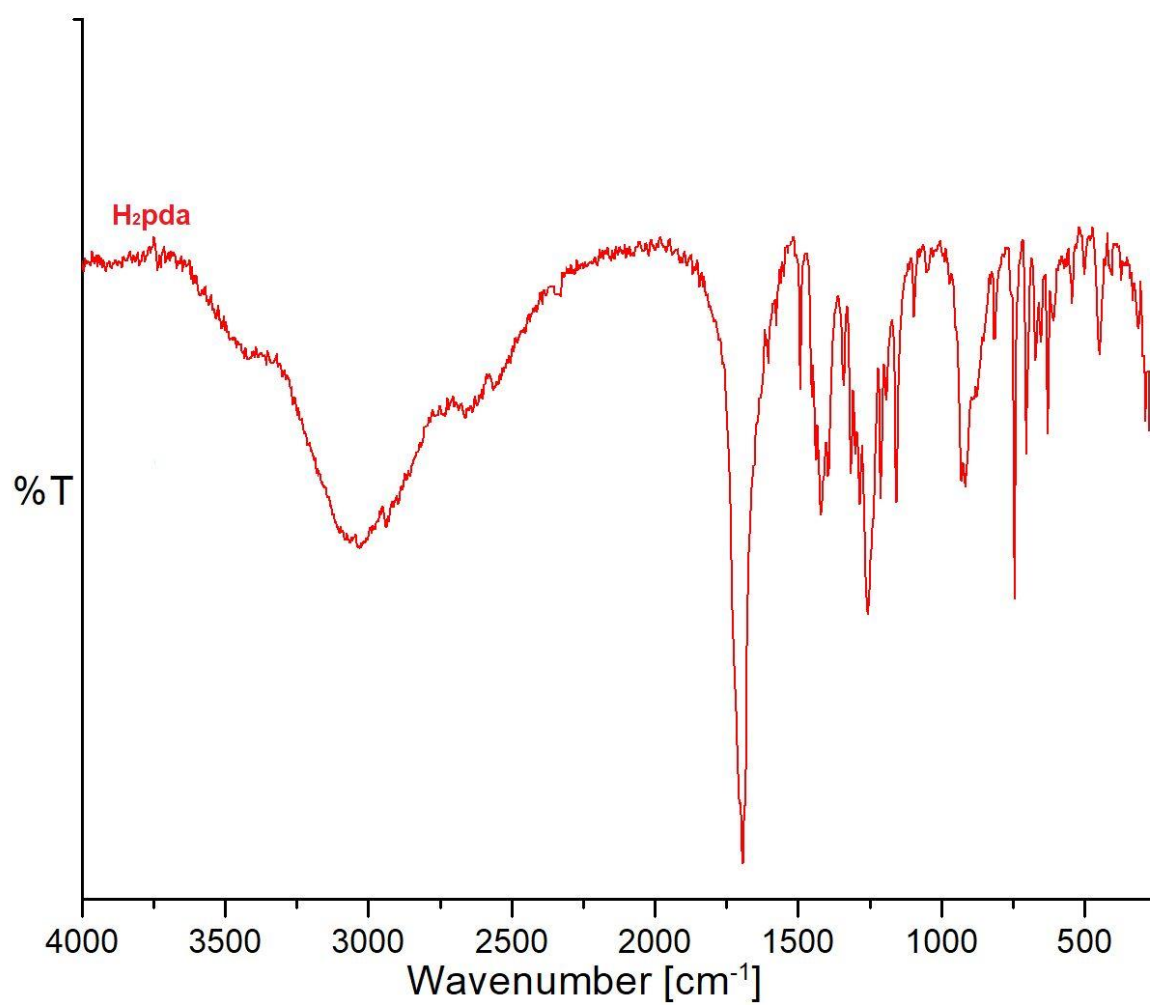

Figure S1. IR spectrum of 1,2-phenylenediacetic acid.
